# Supplementary material for: Procalcitonin Use: Variation Across Hospitals and Trends Over Time
Source: Oxford University Press journal article supplement (doi:10.1542/hpeds.2021-005992), 2021-12-21
Supplement: hpeds_2021-005992supplementarydata.pdf [file hpeds_2021-005992supplementarydata.pdf]

## Supplemental Materials

**SUPPLEMENTAL TABLE 2** Diagnosis Cohort Definitions Based on *International Classification of Diseases* Codes

| Diagnosis                         | ICD-9 Definition                                                                                                                                                                                                                                                                                                                                                                                                                    | ICD-10 Definition                                                                                                                                                                                                                                                                                                                                                                                                                                                                                           |
|-----------------------------------|-------------------------------------------------------------------------------------------------------------------------------------------------------------------------------------------------------------------------------------------------------------------------------------------------------------------------------------------------------------------------------------------------------------------------------------|-------------------------------------------------------------------------------------------------------------------------------------------------------------------------------------------------------------------------------------------------------------------------------------------------------------------------------------------------------------------------------------------------------------------------------------------------------------------------------------------------------------|
| Febrile young infant <sup>a</sup> | Age <2 m AND any admission OR discharge diagnosis code for fever: 780.6 (fever and other physiologic disturbances of temperature regulation), 778.4 (other disturbances of temperature regulation of newborn), 780.60 (fever, unspecified), and 780.61 (fever presenting with conditions classified elsewhere)                                                                                                                      | Age <2 m AND any admission OR discharge diagnosis code for fever: R50 (fever and other physiologic disturbances of temperature regulation), P81.x (other disturbances of temperature regulation of newborn), R50.9 (fever, unspecified), and R50.81 (fever presenting with conditions classified elsewhere)                                                                                                                                                                                                 |
| Pneumonia <sup>b</sup>            | Age ≥2 m to <19 y AND diagnosis of pneumonia defined by primary discharge of pneumonia (480.0–2, 480.8–9, 481, 482.0, 482.30–2, 482.41–2, 482.83, 482.89–90, 483.8, 484.3, 485, 486, 487.0) or effusion/empyema (510.0, 510.9, 511.0–1, 511.8–9, 513) or primary diagnosis of pneumonia related complication (38.9, 458.9, 518.81, 790.7, 799.1, 995.91–2, 997.3), plus any secondary diagnosis of pneumonia or effusion or empyema | Age ≥2 m to <19 y AND diagnosis of pneumonia defined by primary discharge of pneumonia (J11.00, J12.0–3, J12.89, J12.9, J13, J15.0, J15.3, J15.4, J15.211, J15.212, J15.6, J15.8, J15.9, J16.8, J18.0, J18.9, A37.91) or effusion or empyema (J85.1, J85.3, J86.0, J86.9, J90, J91.0, J91.8, J94.8, J94.9, R09.1) or primary diagnosis of pneumonia related complication (J85.1, J85.3, J86.0, J86.9, J90, J91.0, J91.8, J94.8, J94.9, R09.1) plus any secondary diagnosis of pneumonia or effusion/empyema |
| Sepsis <sup>c</sup>               | Age >60 d to 18 y AND discharge diagnosis of severe sepsis (995.92) or septic shock (785.52)                                                                                                                                                                                                                                                                                                                                        | Age >60 d to 18 y AND discharge diagnosis of severe sepsis with or without septic shock (R65.20, R65.21)                                                                                                                                                                                                                                                                                                                                                                                                    |

ICD, *International Classification of Diseases, Ninth Revision*; ICD-10, *International Classification of Diseases, 10th Revision*.

<sup>a</sup>Adapted from Aronson et al.<sup>14</sup>

<sup>b</sup>Adapted algorithm by Williams et al.<sup>15</sup>

<sup>c</sup>Adapted from Balamuth et al.<sup>16</sup>
